# Supplementary material
Source: publisher figshare collection journal article supplement (https://acs.figshare.com/ndownloader/files/3012360)
Supplement: Supplementary file 1 [file 3012360]

## Sheet: 2 Recognize Hazards
Recognize Hazards
Chemical Hazards
Chemical Name	Synonyms	Concentration	Explosive	Oxidizer	Flammable	Corrosive	Gas	Toxic	Health Hazard	Irritant	Environmental	No GHS Hazards	Comments
Reagents
Chemical	Synonyms
Acetone		reagent grade			x					x
Dichloromethane	methylene chloride	reagent grade							x	x
Ethyl Acetate		reagent grade			x					x
Hexanes		reagent grade			x				x	x
Methanol		reagent grade			x			x	x
Toluene		reagent grade			x				x	x
Butanol		reagent grade			x	x				x
Acetic Acid		reagent grade
Nitric acid		reagent grade		x		x
Ninhydrin		reagent grade								x
Ninhydrin in butanol / acetic acid	99% butanol	1% in butanol			x	x				x
Citric acid 10%		10% in water								x
sodium bicarbonate solution		1 Molar in water										x
Saturated NaCl		Saturated in water										x
Mixtures
Solvent 1	Solvent 2
Ethyl Acetate 10%	Hexanes 90%				z				x	x			treat as flammable mixture
Ethyl Acetate 25%	Hexanes 25%				x				x	x
Ethyl Acetate 66%	Hexanes 33%				x					x
Ethyl Acetate 50%	Hexanes 50%				x					x
Dichloromethane 90%	Methanol 10%								x	x
Dichloromethane 95%	Methanol 5%								x	x
Dichloromethane 97%	Methanol 3%								x	x
Process Hazards
	Critical low point	Operating range	Critical high point				Potential Unwanted Chemical Reactivities
High temperatures		operating temperatures based on process needs rather than safety concerns					none expected
Low temperatures		operating temperatures based on process needs rather than safety concerns
High pressures		no unusual pressures expected
Low pressures		no unusual pressures expected

## Sheet: 3 Assess Risks
Assess Risks
Chemical Risks		Flammable	Corrosive	Toxic	Health Hazard	Irritant	Concentration	Maximum size container	Leading hazard concerns	Chemical Risk Level		Process Risks
Reagents									select GHS class with danger signal words	select from high, moderate and low		High temperatures	no
Chemical	Synonyms											Low temperatures	no
Acetone		Danger				Warning	reagent grade	500 ml	flammability	High		Sudden change in temperature	potential
Dichloromethane	methylene chloride				Warning	Warning	reagent grade	500 ml	toxicity	Moderate
Ethyl Acetate		Danger				Warning	reagent grade	500 ml	toxicity	High		High pressures	no
Hexanes		Danger			Danger	Warning	reagent grade	500 ml	flammability and toxicity	High		Low pressures	no
Methanol		Danger		Danger	Danger		reagent grade	500 ml	flammability and toxicity	High
Toluene		Danger			Danger	Warning	reagent grade	500 ml	flammability and toxicity	High		Glassware hazards	yes
Butanol		Danger	Danger			Warning	reagent grade	500 ml	flammability and corrosivity	High
Ninhydrin						Warning	reagent grade	500 ml		Low		Unwanted reactions	unlikely
Ninhydrin in butanol / acetic acid	99% butanol	Danger	Danger			Warning	1% in butanol	500 ml	flammability and corrosivity	High
Citric acid 10%						Warning	10% in water	500 ml		Low
sodium bicarbonate solution							1 Molar in water			Low
Saturated NaCl							Saturated in water			Low
Mixtures												Summary of Significant Risks
Solvent 1	Solvent 2											"significant risks" are those that drive the selection of protection strategies
Ethyl Acetate 10%	Hexanes 90%	Danger			Danger	Warning	See first two columns	500 ml	flammable mixture; health hazard concern	High		type of risk	significant?
Ethyl Acetate 25%	Hexanes 25%	Danger			Warning	Warning	See first two columns	500 ml	flammable mixture; health hazard concern	High		fire hazard	yes
Ethyl Acetate 66%	Hexanes 33%	Danger			Warning	Warning	See first two columns	500 ml	flammable mixture; health hazard concern	High		corrosive chemicals	yes
Ethyl Acetate 50%	Hexanes 50%	Danger			Danger	Warning	See first two columns	500 ml	flammable mixture; health hazard concern	High		toxicity	yes
Dichloromethane 90%	Methanol 10%				Warning	Warning	See first two columns	500 ml	non-flammable mixture; toxicity concern	Moderate		chemical compatibility	no specific concerns
Dichloromethane 95%	Methanol 5%				Warning	Warning	See first two columns	500 ml	non-flammable mixture; toxicity concern	Moderate		process risks	list
Dichloromethane 97%	Methanol 3%				Warning	Warning	See first two columns	500 ml	non-flammable mixture; toxicity concern	Moderate		other risks	gllassware issues

## Sheet: 4 Manage Safety
Manage Safety
Adjusting the Chemistry
chemical hazards are minimized by using minimum quantities necessary to conduct the work
Engineering Controls
local exhaust requirements	fume hood			general recommendations are likely to be found in the institutional Chemical Hygiene Plan
general ventilation rate	moderate			general ventilation rates are likely to be defined in the institutional Laboratory Ventilation Management Plan
chemical storage required	flammable storage			general recommendations are likely to be found in the institutional Chemical Hygiene Plan
Training and Oversight
Laboratory safety inspection checklist location	lab safety notebook	Frequency of inspections	weekly
is working alone on this process acceptable?	yes
Is running this process unattended acceptable?	no	if yes, provide template for placarding during auattended operation
Training requirements		date of institutional training	date of local training
working with flammable liquids	yes
working with corrosives	yes
contamination control practices	yes
glassware safety	yes
laboratory waste disposal practices	yes
process specific training (e.g. working with special hazards or equipment precautions):	name of training
Personal Protective Equipment
Area protected	Type of PPE	When required	Where required	Advantages of this PPE	Challenges of this PPE	Comments
Eyes	glasses	all times	all times	protection during anticipated emergencies	comfort
Face	none	none	all times	protection during anticipated emergencies	ergonomics, vision problems
Hands	nitrile gloves	during operations	at bench, at hood	protection during anticipated emergencies	potential for cross contamination
Torso	general clothing	all times	all times	protection during anticipated emergencies	potential for cross contamination
Legs and feet	pants and shoes	all times	all times	protection during anticipated emergencies	potential for cross contamination

## Sheet: 5 Planning for Emergencies
Planning for Emergencies						Definitions
Most likely emergencies (outside assistance will be required)						Term	Meaning
Fire	moderate					high potential	has occurred before in this lab before
Explosion	low potential					moderate potential	has occurred in other labs doing similar work
Medical emergency	high potential for glassware injuries, chemical spills					low potential	possible but previous instances not found in the literature
Major chemical spill	low potential, due to low quantities being used					not possible	no forsseable scenario results in this event
Most likely disruptive events (work must stop to control an unexpected event, but resources on hand should be able to control it)
Fire	moderate
Explosion	low potential
First Aid Event	moderate
Major chemical spill	low
Maximum Foreseeable Event
Dropping a stock bottle of flammable solvent leading to a fire; the building is sprinklered, so the level of loss is likely to be limited to water damage
Required Emergency Equipment amd Maintenance Schedule
	Required?	Maintenance schedule	Last checked
Eyewash	yes	flush each semester	2015-08-01
Safety shower	yes	flush each semester	2015-08-01
Fire extinguishers	yes	refill as used; check monthly	2015-08-01
Spill Kit	yes	refill as used; check presence weekly	2015-08-01
First Aid Kit	yes	refill as used; check each semseter	2015-08-01

## Sheet: 6 Protecting the Environment
Environmental Aspects
Laboratory Wastes
Waste stream	Hazards	Expected amounts	Disposal option
Chemical Waste Streams
solvent wastes	flammability	less than 1 gallon per month	collection for chemical waste disposal
Sharps Waste Streams
broken and contaminated glassware	cuts and property damage	1 glassware box per month	Trash disposal in secure packaging
Biological wastes
		none
Solid waste	None	unknown	Trash
Energy Conservation
Close fume hood sash when working away from hood
Green Chemistry Elements
1. Quantities used are one third of what is described in the literature
2. The procedure used involves fewer hazards that alternative methods
